# Supplementary material
Source: PubMed Central journal article supplement (PMC7965652)
Supplement: mmc1.pdf [file mmc1.pdf]

## Adherence to Asthma Biologics: Implications for Patient Selection, Step Therapy, and Outcomes

*Jacob T. Maddux, MD; Jonathan W. Inselman, MS; Molly M. Jeffery, PhD;  
Regina W. Lam, BA; Nilay D. Shah, PhD; and Matthew A. Rank, MD*

CHEST 2021; 159(3):924-932

*Online supplements are not copyedited prior to posting and the author(s) take full responsibility for the accuracy of all data.*

© 2020 AMERICAN COLLEGE OF CHEST PHYSICIANS. Reproduction of this article is prohibited without written permission from the American College of Chest Physicians. See online for more details. DOI: 10.1016/j.chest.2020.10.050

**e-Table 1**

| <b>Drug</b>  | <b>Criteria</b>                                           | <b>Days Supply</b>                                |
|--------------|-----------------------------------------------------------|---------------------------------------------------|
| Omalizumab   | If have 3 fills within < 3 weeks of previous fill         | 2 weeks                                           |
|              | If have 2 or less fills within < 3 weeks of previous fill | 4 weeks                                           |
| Mepolizumab  | ANY                                                       | 4 weeks                                           |
| Reslizumab   | ANY                                                       | 4 weeks                                           |
| Dupilumab    | ANY                                                       | Count of days supply variable from pharmacy claim |
| Benralizumab | First 3 fills                                             | 4 weeks                                           |
|              | fill 4 and later                                          | 8 weeks                                           |
